# Supplementary material for: Valeriana rigida Ruiz & Pav. Root Extract: A New Source of Caffeoylquinic Acids with Antioxidant and Aldose Reductase Inhibitory Activities
Source: MDPI journal article supplement (doi:10.3390/foods10051079), 2021-05-13
Supplement: s1 [file s1]

Supplementary Materials

**Table 1.** Antioxidant activity of the 70% MeOH root extract of *V. rigida* using DPPH, ABTS, and ORAC assays.

| Sample  | TE (μmol Trolox equivalents per μg extract) |             |             |
|---------|---------------------------------------------|-------------|-------------|
|         | DPPH                                        | ABTS        | ORAC        |
| Extract | 0.75 ± 0.05                                 | 0.82 ± 0.05 | 2.60 ± 0.08 |

Note: the antioxidant activity is expressed as Trolox equivalent antioxidant capacity (TE) (μmol Trolox equivalents/μg extract). Data was presented as mean ± SD (*n* ≥ 3).

**Table 2.** Partition coefficients ( $K_{\text{upper/lower}}$ ) of target compounds **1–7** in different solvent systems.

| Scheme 1.                                                                        | $K_{\text{(upper/lower) value}}$ |      |      |      |      |      |       |
|----------------------------------------------------------------------------------|----------------------------------|------|------|------|------|------|-------|
|                                                                                  | 1                                | 2    | 3    | 4    | 5    | 6    | 7     |
| <i>n</i> -Hexane/EtOAc/MeOH/H <sub>2</sub> O, 2:5:2:5                            | 0.01                             | 0.00 | 0.01 | 0.01 | 0.05 | 0.03 | 0.07  |
| <i>n</i> -Hexane/EtOAc/MeOH/H <sub>2</sub> O, 1:5:1:5                            | 0.00                             | 0.02 | 0.03 | 0.16 | 0.46 | 0.34 | 2.69  |
| EtOAc/H <sub>2</sub> O, 5:5                                                      | 0.00                             | 0.01 | 0.02 | 0.53 | 2.36 | 2.17 | 35.91 |
| <i>n</i> -Hexane/EtOAc/MeOH/H <sub>2</sub> O, 0.8:5:1.2:5                        | 0.00                             | 0.00 | 0.01 | 0.24 | 0.71 | 0.51 | 4.13  |
| <i>n</i> -Hexane/EtOAc/MeOH/H <sub>2</sub> O, 0.5:5:1.5:5                        | 0.00                             | 0.01 | 0.02 | 0.30 | 1.29 | 0.89 | 5.16  |
| <i>n</i> -Hexane/EtOAc/MeOH/H <sub>2</sub> O, 0.8:5:1.2:5                        | 0.00                             | 0.02 | 0.02 | 0.39 | 1.14 | 0.73 | 5.62  |
| <i>n</i> -Hexane/EtOAc/MeOH/H <sub>2</sub> O,<br>0.8:5:1.2:5+17.4 mM acetic acid | 0.04                             | 0.20 | 0.18 | 2.49 | 3.26 | 3.58 | 8.40  |
| <i>n</i> -Hexane/EtOAc/MeOH/H <sub>2</sub> O,<br>0.5:5:1.5:5+17.4 mM acetic acid | 0.11                             | 0.26 | 0.32 | 1.79 | 4.28 | 5.10 | 8.94  |
| <i>n</i> -Hexane/EtOAc/MeOH/H <sub>2</sub> O,<br>0.8:5:1.2:5+17.4 mM acetic acid | 0.33                             | 0.46 | 0.58 | 3.00 | 4.60 | 5.18 | 14.82 |

**Table S3.** <sup>1</sup>H-NMR chemical shifts ( $\delta_{\text{H}}$  in ppm) and coupling constants ( $J$  in Hz) of the compounds **1–8** separated from the 70% MeOH extract of *V. rigida* root.

[illegible]

Note: the field strengths (MHz) and solvents used for  $^1\text{H}$ -NMR checking are 600 MHz ( $\text{DMSO}-d_6$ ) for 3-*O*-caffeoylquinic acid (3-CQA), 4-*O*-caffeoylquinic acid (4-CQA), 5-*O*-caffeoylquinic acid (5-CQA), 3,4-*O*-di-caffeoylquinic acid (3,4-diCQA), 3,5-*O*-di-caffeoylquinic acid (3,5-diCQA), and 3,4,5-*O*-tri-caffeoylquinic acid (3,4,5-triCQA); 600 MHz ( $\text{MeOD}-d_4$ ) for 4,5-*O*-di-caffeoylquinic acid (4,5-diCQA); 400 MHz ( $\text{DMSO}-d_6$ ) for acacetin. “-” means no signals appeared.
